# New Titles on Integrated Care

Just Published!

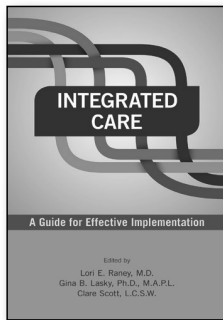

## *Integrated Care*

*A Guide for Effective Implementation*

NEW!

Edited by **Lori E. Raney, M.D., Gina B. Lasky, Ph.D., M.A.P.L., and Clare Scott, L.C.S.W.**

This book provides a detailed, thoughtful, and experience-based guide to the complex and potentially overwhelming process of implementing an integrated care program. The advantages of integrated care from both the clinical and administrative perspectives are many, including better detection of illness, improvement in overall health outcomes, a better patient care experience, and flexibility in responding to policy and financial changes. The book addresses the emerging framework of core principles for effective integrated care, reviews the most up-to-date research on implementation, and presents practice-based experience to serve as a guide. This information is useful in both traditional integration of behavioral health into general medical settings or integrating general medical care into a specialty mental health or substance use treatment setting. Because administrators, clinicians, policy makers, payers and others need guidance in determining what effective implementation looks like, the authors offer a three-part examination of the key components of an implementation strategy and explore the elements essential for success.

2017 • 290 pages • ISBN 978-1-61537-054-2 • Paperback • \$59.00 • Item #37054

2017 • 290 pages • ISBN 978-1-61537-133-4 • eBook • \$47.00 • Item #37133

## *Study Guide to Preventive Medical Care in Psychiatry*

*A Case Approach*

NEW!

Edited by **Robert M. McCarron, D.O., Glen L. Xiong, M.D., Craig R. Keenan, M.D., Lorin M. Scher, M.D., Jaesu Han, M.D., and Mark E. Servis, M.D.**

*Study Guide to Preventive Medical Care in Psychiatry: A Case Approach* is an indispensable companion to *Preventive Medical Care in Psychiatry: A Practical Guide for Clinicians*. Like the primary text, the study guide was written by experts in the field and it reflects the text's focus on clinical care for psychiatrists and other mental health care providers who work in outpatient mental health and integrated clinics. Through the deft use of clinical cases, the study guide helps providers and trainees acquire the knowledge and skills necessary to view the patient holistically and improve outcomes.

2017 • 313 pages • ISBN 978-1-61537-057-3 • Paperback • \$59.00 • Item #37057

2017 • 313 pages • ISBN 978-1-61537-116-7 • eBook • \$47.00 • Item #37116

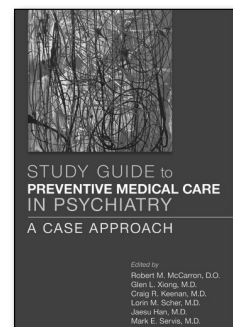

Order Now

[www.appi.org](http://www.appi.org)

20% Discount for American Psychiatric Association Members  
25% Discount for APA Resident-Fellow Members

Please use Priority Code AH1737 when ordering.

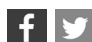

AMERICAN  
PSYCHIATRIC  
ASSOCIATION  
PUBLISHING

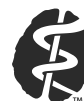

[www.appi.org](http://www.appi.org)

Email: [appi@psych.org](mailto:appi@psych.org)

Toll Free: 1-800-368-5777

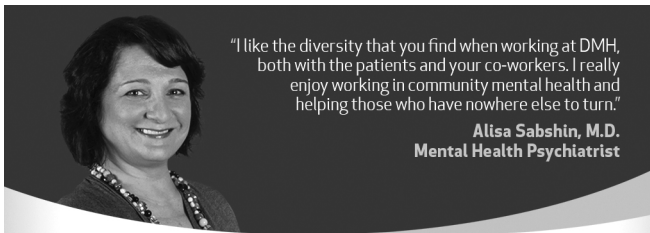

"I like the diversity that you find when working at DMH, both with the patients and your co-workers. I really enjoy working in community mental health and helping those who have nowhere else to turn."

**Alisa Sabshin, M.D.**  
Mental Health Psychiatrist

# Our work *matters*

Los Angeles County has immediate openings with Antelope Valley, Correctional Health Services, Juvenile Halls and Probation Camps, and directly operated programs. This is your chance to join a nationally recognized mental health agency and work in a professionally rewarding, diverse, and exciting environment. The County is filled with opportunities for professional development and growth, including new full-time and part-time psychiatrist positions.

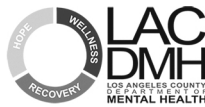

[www.psychiatristjobs.la](http://www.psychiatristjobs.la)

- ✓ Competitive starting salaries and benefits
- ✓ Potential Bonuses up to \$30,000\* a year
- ✓ Up to 24 hours/wk for outside employment

\*Depending on qualifications and placement.

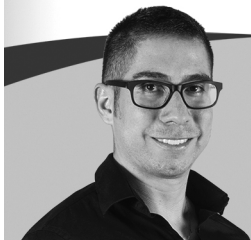

"I picked DMH because it gave me the opportunity to work with a wide variety of patient populations and overall makes my career very fulfilling. It's a great place to continue to learn, with a very nurturing environment. Come join us!"

**Carlos Contreras, M.D.**  
Mental Health Psychiatrist

**Psychiatric Services** (ISSN |1075-2730; online version, 1557-9700) is published monthly by the American Psychiatric Association, editorial and executive office, 1000 Wilson Blvd., Suite 1825, Arlington, VA 22209-3901. Copyright © 2016 by the American Psychiatric Association. Printed in U.S.A. Periodicals postage paid at Arlington, VA, and at additional mailing offices. **POSTMASTER: Send address changes to *Psychiatric Services*, 1000 Wilson Blvd., Suite 1825, Arlington, VA 22209-3901.**



We are pleased to announce that  
**HAROLD ALAN PINCUS, M.D.**  
is the 2017 recipient of the  
**C. CHARLES BURLINGAME, M.D. AWARD**  
for his outstanding contributions to psychiatry.

**Past Recipients**  
1988 Robert Kellner, M.D., Ph.D.  
1989 William T. Carpenter, Jr., M.D.  
1990 Dennis P. Cantwell, M.D.  
1991 George E. Vaillant, M.D.  
1992 A. John Rush, M.D.  
1993 John C. Nemiah, M.D.  
1994 Maurice J. Martin, M.D.  
1995 Otto F. Kernberg, M.D.  
1996 Charles P. O'Brien, M.D., Ph.D.  
1997 Glen Owen Gabbard, M.D.  
1998 Lissy F. Jarvik, M.D., Ph.D.  
1999 Nancy C. Andreasen, M.D., Ph.D.  
2000 Lewis L. Judd, M.D.  
2001 Paul S. Appelbaum, M.D.  
2002 Charles B. Nemeroff, M.D., Ph.D.  
2003 Dilip V. Jeste, M.D.  
2004 David H. Barlow, Ph.D.  
2005 Herbert D. Kleber, M.D.  
2006 Daniel N. Stern, M.D.  
2007 Jerrold F. Rosenbaum, M.D.  
2008 K. Ranga Rama Krishnan, M.D.  
2009 David J. Kupfer, M.D.  
2010 Professor Sir Michael Rutter  
2011 Jeffrey A. Lieberman, M.D.  
2012 Judith L. Rapoport, M.D.  
2013 Nora D. Volkow, M.D.  
2014 Daniel R. Weinberger, M.D.  
2015 David A. Brent, M.D.  
2016 Steven S. Sharfstein, M.D.

**Institute of Living**  
A Division of Hartford Hospital

200 Retreat Avenue  
Hartford, CT 06106  
1-800-673-2411

## Casebook of Neuropsychiatry

Edited by Trevor A. Hurwitz, M.B., Ch.B.,  
and Warren T. Lee, M.D., Ph.D.

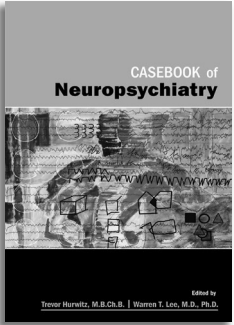

**Casebook of Neuropsychiatry** is comprised of 38 clinical cases based on real patient interactions that straddle the domains of neurology and psychiatry. The book is designed to supplement comprehensive texts by providing real-world accounts of patient presentations that clinicians are likely to encounter.

2013 • 383 pages • ISBN 978-1-58562-431-7 • Paperback  
\$83.00 • Item #62431

2013 • 383 pages • ISBN 978-1-58562-992-3 • eBook  
\$66.00 • Item #62992

AMERICAN  
**PSYCHIATRIC**  
ASSOCIATION  
**PUBLISHING**



[www.appi.org](http://www.appi.org)  
Email: [appi@psych.org](mailto:appi@psych.org)  
Phone: 1-800-368-5777

AH1732A

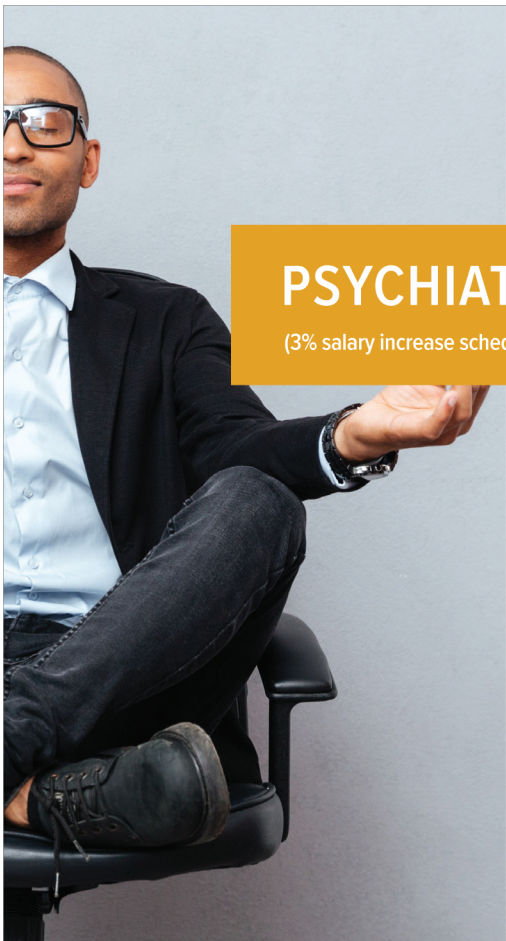

# FIND YOUR CAREER BALANCE IN CALIFORNIA

## PSYCHIATRISTS

(3% salary increase scheduled for July 1, 2017)

**\$249,012 - \$299,208**  
annual salary (Board Certified)

**\$242,616 - \$290,772**  
annual salary (Board Eligible)

California Correctional Health Care Services is seeking proactive, knowledgeable psychiatrists with an interest in correctional and/or forensic psychiatry to join our multidisciplinary teams. Within the California Department of Corrections and Rehabilitation's facilities, you will find like-minded professionals well-versed in the intricate psychiatric and medical interplay necessary to treat our diverse patient population. Here, you will see and develop treatment plans for cases you won't encounter in any other practice. And with our strong Positive Behavioral Support Team's assistance, you'll be able to devote your time to practicing and honing advanced psychopharmacological skills. Plus, with 35 locations throughout California, you're sure to find your perfect fit.

In return for your efforts, we offer:

- 40-hour workweek with flexible schedules
- Generous paid time off and holiday schedule
- State of California pension that vests in five years
- 401(k) and 457 options – tax defer up to \$48,000 per year
- Paid insurance, license, and DEA renewal
- Visa sponsorship opportunities
- Paid CME with paid time off to attend
- \$10,000 Thank You Bonus to professionals newly hired with the State of California

Take the first step in joining one of our teams and contact **LaTreese Phillips** at **916-691-4818** or **LaTreese.Phillips@cdcr.ca.gov**. You may also apply online at **www.ChangingPrisonHealthCare.org**.

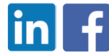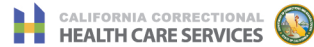

EOE

## Management of Adults With Traumatic Brain Injury

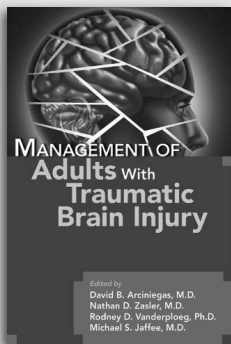

Edited by David B. Arciniegas, M.D., Nathan D. Zasler, M.D., Rodney D. Vanderploeg, Ph.D., and Michael S. Jaffee, M.D.

Traumatic brain injury (TBI) is a public health issue of worldwide proportions, affecting motorists, victims of interpersonal violence, athletes, military service members, and Veterans, among others. **Management of Adults with Traumatic Brain Injury** provides evidence-informed guidance on the core topics in brain injury medicine, including the epidemiology and pathophysiology of TBI, the medical evaluation and neuropsychological assessment

of persons with TBI, and the common cognitive, emotional, behavioral, and other neurological disturbances for which persons with TBI and their families seek clinical care.

This book is a must-read for every physician, nurse, and mental health practitioner working to improve the lives of persons with TBI.

2013 • 587 pages • ISBN 978-1-58562-404-1 • Paperback • \$87.00 • Item #62404

2013 • 587 pages • ISBN 978-1-58562-988-6 • eBook • \$70.00 • Item #62988

AMERICAN  
PSYCHIATRIC  
ASSOCIATION  
PUBLISHING

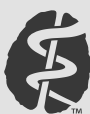

Order Online: [www.appi.org](http://www.appi.org)  
Phone: 703-907-7322  
Toll Free: 1-800-368-5777  
Email: [appi@psych.org](mailto:appi@psych.org)

20% Discount for American Psychiatric Association Members

25% Discount for APA Resident-Fellow Members AH1730A

# American Psychiatric Association Publishing Textbook of Psychopharmacology, Fifth Edition

Edited by Alan F. Schatzberg, M.D., and Charles B. Nemeroff, M.D., Ph.D.

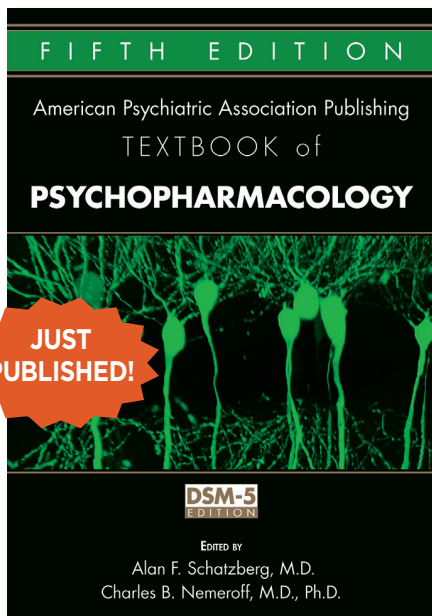

The *American Psychiatric Association Publishing Textbook of Psychopharmacology* is an indispensable and comprehensive resource for clinicians and trainees who prescribe psychotropic medications. Updated to reflect the new DSM-5 classification, this revised Fifth Edition maintains the user-friendly structure of its predecessors while offering in-depth coverage of the latest research in pharmacological principles, classes of drugs, and psychiatric disorders. Introductory chapters provide a theoretical grounding in clinical applications, with topics ranging from neurotransmitters to brain imaging in psychopharmacology. The bulk of the book is devoted to various classes of drugs, including antidepressants, anxiolytics, antipsychotics, mood stabilizers, and other agents, with each class divided into chapters on specific drugs—either new or revised to include the latest findings and trends.

Finally, the section on psychopharmacological treatment addresses evidence-based principles of clinical care for the full spectrum of mental disorders and conditions as well as for specific populations and circumstances—offering information on topics such as medication selection, combination and maintenance dosing regimens, monitoring and management of side effects, and strategies for optimizing treatment response.

## The book's beneficial features are many:

- The section on principles of pharmacology has been revised and reorganized to incorporate recent discoveries from the fields of neurobiology, genetics, brain imaging, and epidemiology.
- History and discovery, structure–activity relationships, pharmacological profiles, pharmacokinetics and disposition, mechanisms of action, indications and efficacy, side effects and toxicology, and drug–drug interactions are addressed for each agent. This consistent structure places the desired information at the clinician's fingertips and facilitates study for trainees.
- Coverage of drugs approved since the last edition is thorough, encompassing new antidepressants (e.g., vortioxetine), new antipsychotics (e.g., cariprazine), and agents on the clinical horizon (e.g., ketamine).

A work of uncommon scientific rigor and clinical utility, *The American Psychiatric Association Publishing Textbook of Psychopharmacology* provides state-of-the-art information on both the principles and the practice of psychopharmacological treatment of psychiatric disorders.

2017 • 1,823 pages • ISBN 978-1-58562-523-9 • Hardcover • \$299.00 • Item #62523

2017 • 1,823 pages • ISBN 978-1-61537-122-8 • eBook • \$240.00 • Item #37122

AMERICAN  
PSYCHIATRIC  
ASSOCIATION  
PUBLISHING

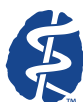

[www.appi.org](http://www.appi.org)

Email: [appi@psych.org](mailto:appi@psych.org)

Toll Free: 1-800-368-5777

20% Discount for American Psychiatric Association Members  
25% Discount for APA Resident-Fellow Members

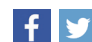

Priority Code AH1713
