# Psychiatric Services

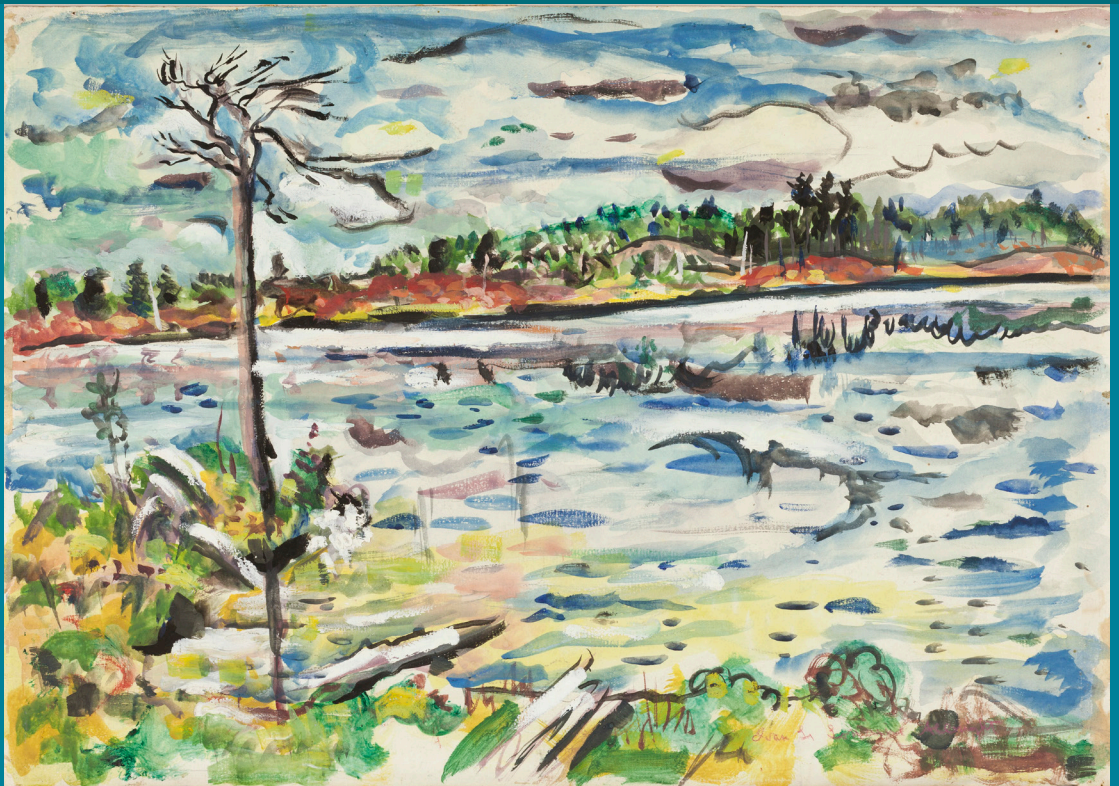

Peer workers helping Australian youths in shared decision making

Using power statements to identify medication treatment goals

General medical conditions and mental health: two reports

AMERICAN  
**PSYCHIATRIC**  
ASSOCIATION

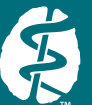

[ps.psychiatryonline.org](http://ps.psychiatryonline.org)
