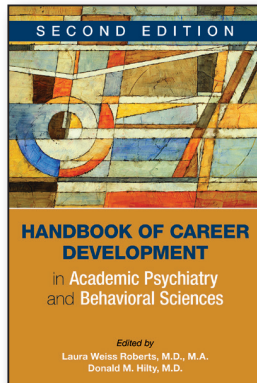

## Handbook of Career Development in Academic Psychiatry and Behavioral Sciences, Second Edition

Edited by Laura Weiss Roberts, M.D., M.A., and Donald M. Hilty, M.D.

*The Handbook of Career Development in Academic Psychiatry and Behavioral Sciences, Second Edition, provides real-world advice with compassion. Readers will find just what they need when they need it: step-by-step guidance to approaching the tasks and challenges that face them, questions to discuss with mentors and colleagues, and professionally vetted online career development resources.*

2017 • 437 pages • ISBN 978-1-61537-058-0 • Paperback • \$69.00 • Item #37058

2017 • 437 pages • ISBN 978-1-61537-123-5 • eBook • \$55.00 • Item #37123

## Basics of Psychotherapy

A Practical Guide to Improving Clinical Success

Richard B. Makover, M.D.

*Basics of Psychotherapy* is written in a clear, straightforward style that reads easily and conveys its ideas with engaging simplicity. Every point is skillfully illustrated by clinical examples. Scripted excerpts of therapy sessions not only reproduce the dialogue, they also contain notes and commentary that explain exactly what is happening between therapist and patient. Tables and illustrations summarize the topics explained in the text. This practical and up-to-date book should be of use to the beginning therapist and the experienced clinician alike.

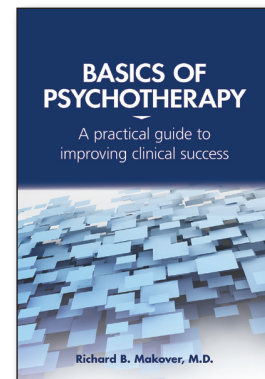

2017 • 332 pages • ISBN 978-1-61537-076-4 • Paperback • \$59.00 • Item #37076

2017 • 332 pages • ISBN 978-1-61537-132-7 • eBook • \$47.00 • Item #37132

Order Now [www.appi.org](http://www.appi.org)

20% Discount for American Psychiatric Association Members  
25% Discount for APA Resident-Fellow Members

Please use Priority Code AH1737 when ordering.

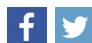

AMERICAN  
PSYCHIATRIC  
ASSOCIATION  
PUBLISHING

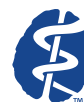

[www.appi.org](http://www.appi.org)

Email: [appi@psych.org](mailto:appi@psych.org)

Toll Free: 1-800-368-5777
